# Supplementary material for: Evaluation of ultrasound-guided erector spinae plane block for postoperative management of video-assisted thoracoscopic surgery: a prospective, randomized, controlled clinical trial
Source: PubMed Central journal article supplement — J Thorac Dis. 2020 Aug;12(8):4174–82. doi: 10.21037/jtd-20-689 (PMC7475548; doi:10.21037/jtd-20-689), 2020-08
Supplement: jtd-12-08-4174-dss.pdf [file jtd-12-08-4174-dss.pdf]

## Data Sharing Statement

|                     |                                                                                                                                                    |                                                                                                                                             |
|---------------------|----------------------------------------------------------------------------------------------------------------------------------------------------|---------------------------------------------------------------------------------------------------------------------------------------------|
| <b>Article Info</b> | <a href="http://dx.doi.org/10.21037/jtd-20-689">http://dx.doi.org/10.21037/jtd-20-689</a> .                                                        |                                                                                                                                             |
| <b>Item</b>         | <b>Question</b>                                                                                                                                    | <b>Authors' Response<br/>(place "-" if not applicable)</b>                                                                                  |
| 1                   | Would you like to share data collected for your study to others?                                                                                   | Yes                                                                                                                                         |
| 2                   | If not, would you like to share the reason for your decision?                                                                                      | -                                                                                                                                           |
| 3                   | What data in particular will be shared?                                                                                                            | The analgesic effects of erector spinae plane block (ESPB) in patients undergoing VATS will be shared                                       |
| 4                   | Any other documents will be share? Such as study protocol, statistical analysis plan, informed consent form, clinical study report, analytic code. | Study protocol, statistical analysis plan, informed consent form, and clinical study report will also be shared if requested.               |
| 5                   | When will data availability begin?                                                                                                                 | From the publication date                                                                                                                   |
| 6                   | When will data availability end?                                                                                                                   | The deadline cannot be specially defined.                                                                                                   |
| 7                   | To whom will you share the data?                                                                                                                   | Thoracic surgeon and anesthesiologist who are interested in post-operative pain control.                                                    |
| 8                   | For what type of analysis or purpose?                                                                                                              | For analysis to evaluate the analgesic effects of ESPB in patients undergoing VATS                                                          |
| 9                   | How or where can the data/documents be obtained?                                                                                                   | Emails could be sent to the address below to obtain the shared data: <a href="mailto:jaegeum.shim@samsung.com">jaegeum.shim@samsung.com</a> |
| 10                  | Any other restrictions?                                                                                                                            | We may balance the potential benefits and risks for each request and then provide the data that could be shared.                            |
